# Supplementary material for: Comprehensive Analysis Uncovers Prognostic and Immunogenic Characteristics of Cellular Senescence for Lung Adenocarcinoma
Source: PubMed Central journal article supplement (PMC8636167; doi:10.3389/fcell.2021.780461), 2021-11-16
Supplement: DataSheet1.pdf [file DataSheet1.pdf]

Figure S1

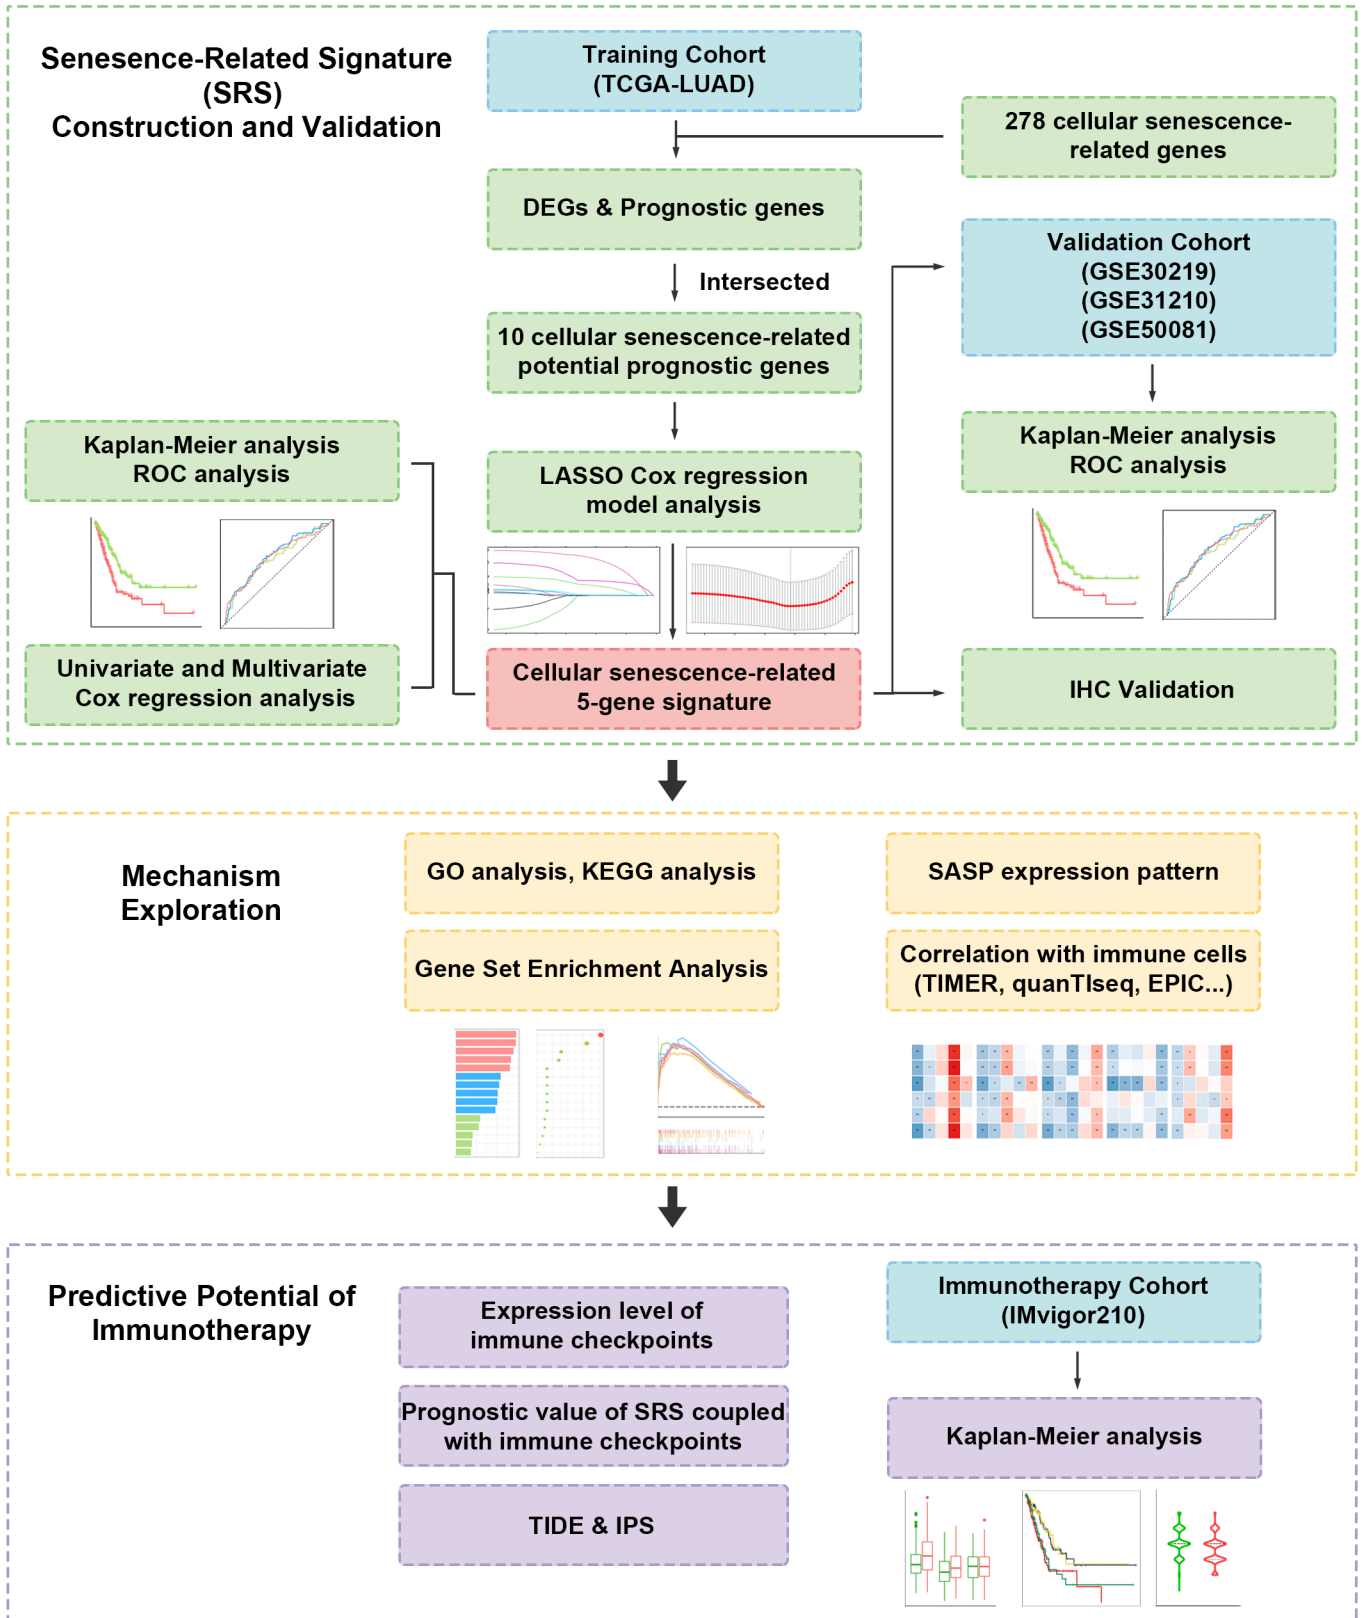

Figure S1. The flow diagram of this study.

**Figure S2**

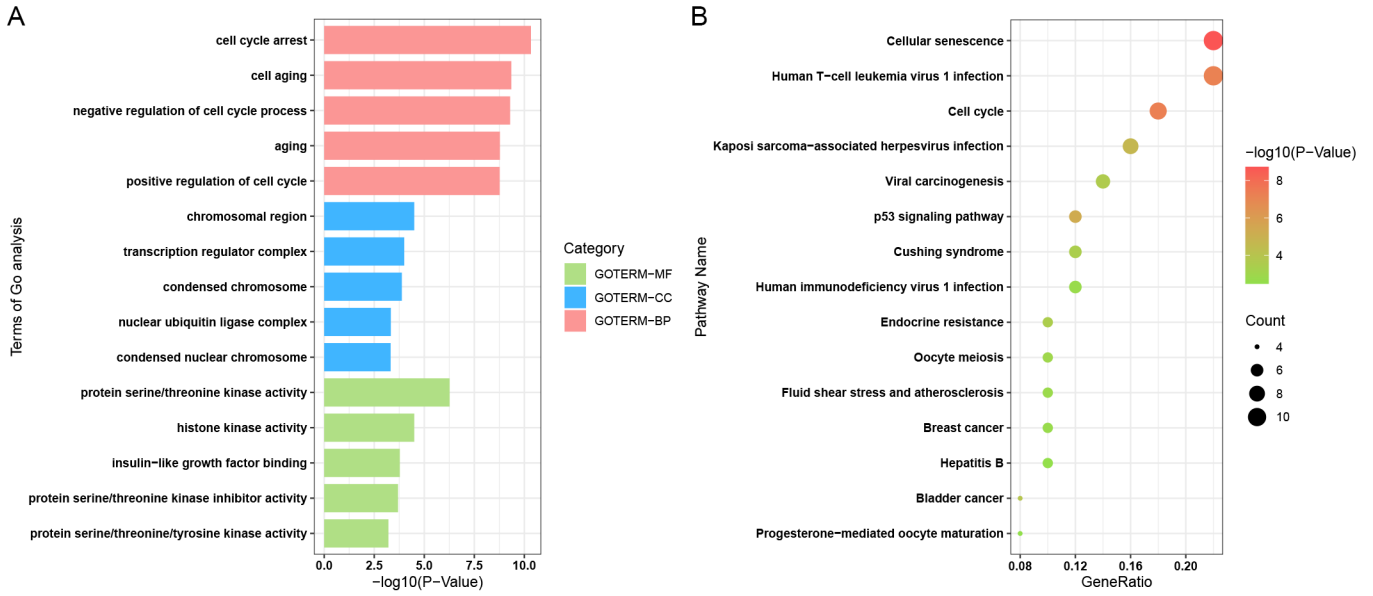

**Figure S2.** GO enrichment analysis (A) and KEGG pathway enrichment analysis (B) of the differentially expressed cellular senescence-related genes.

**Figure S3**

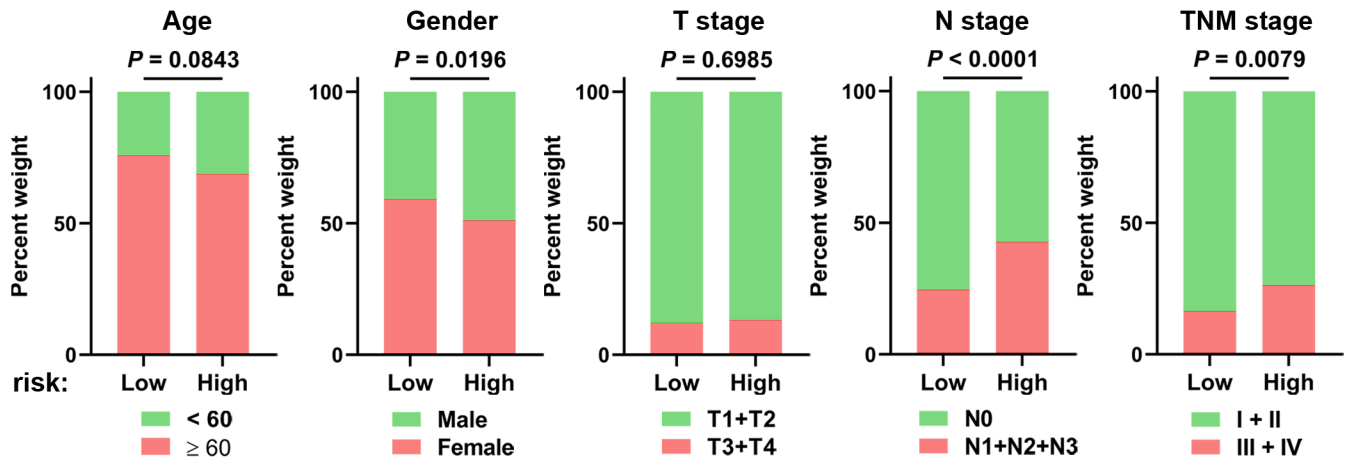

**Figure S3.** The correlation between SRS and patients' clinicopathological parameters, including age, sex, T stage, N stage and TNM stage.

**Figure S4**

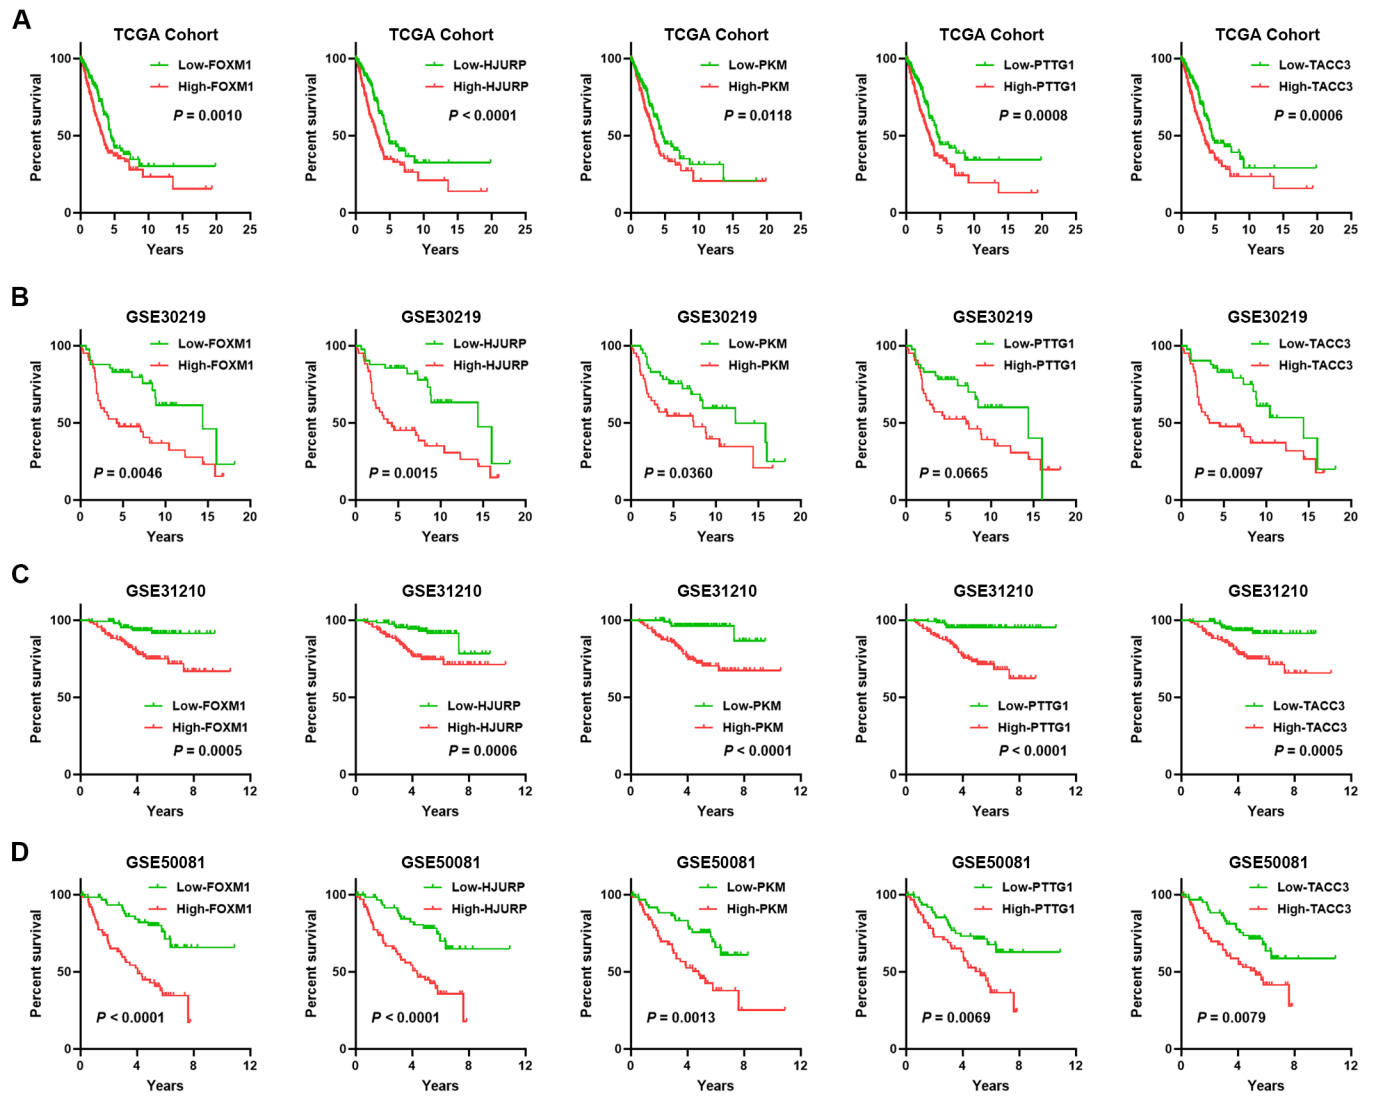

**Figure S4.** Kaplan-Meier curves for patients with high and low expression of FOXM1, HJURP, PKM, PTTG1 and TACC3 in both the training (A) and validation (B-D) cohorts.

**Figure S5**

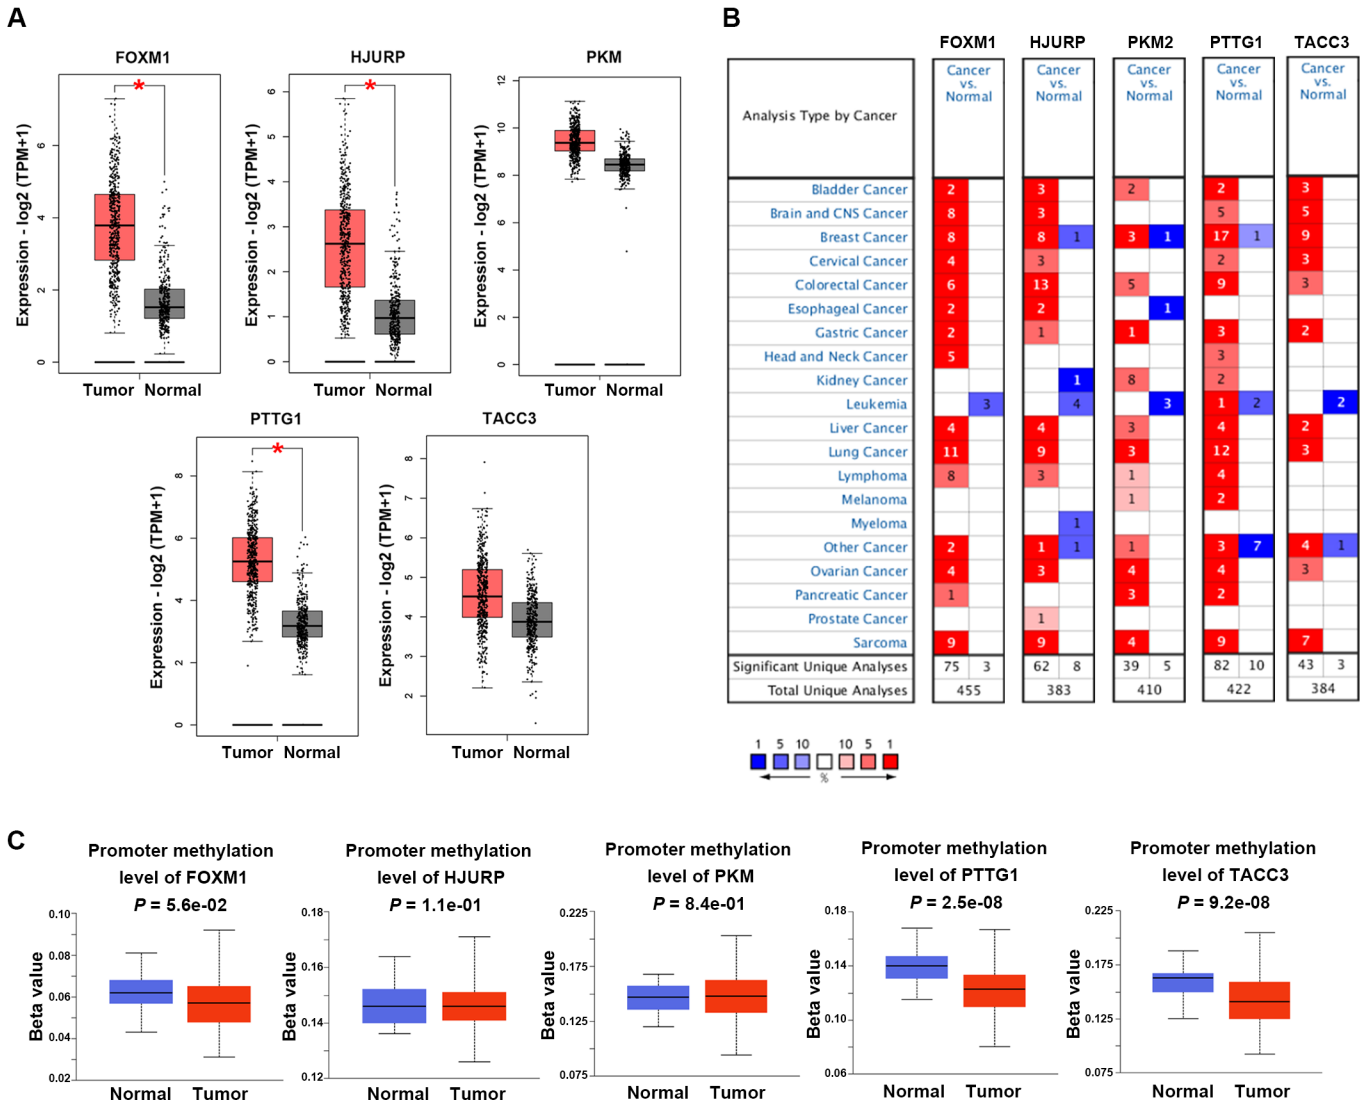

**Figure S5.**

A. Analysis of FOXM1, HJURP, PKM, PTTG1 and TACC3 expression in GEPIA2, \* represents  $P < 0.05$ .

B. Pancancer analysis of FOXM1, HJURP, PKM, PTTG1 and TACC3 expression in Oncomine.

C. Promoter methylation levels of the five genes between normal and tumour tissues were evaluated using UALCAN.

**Figure S6**

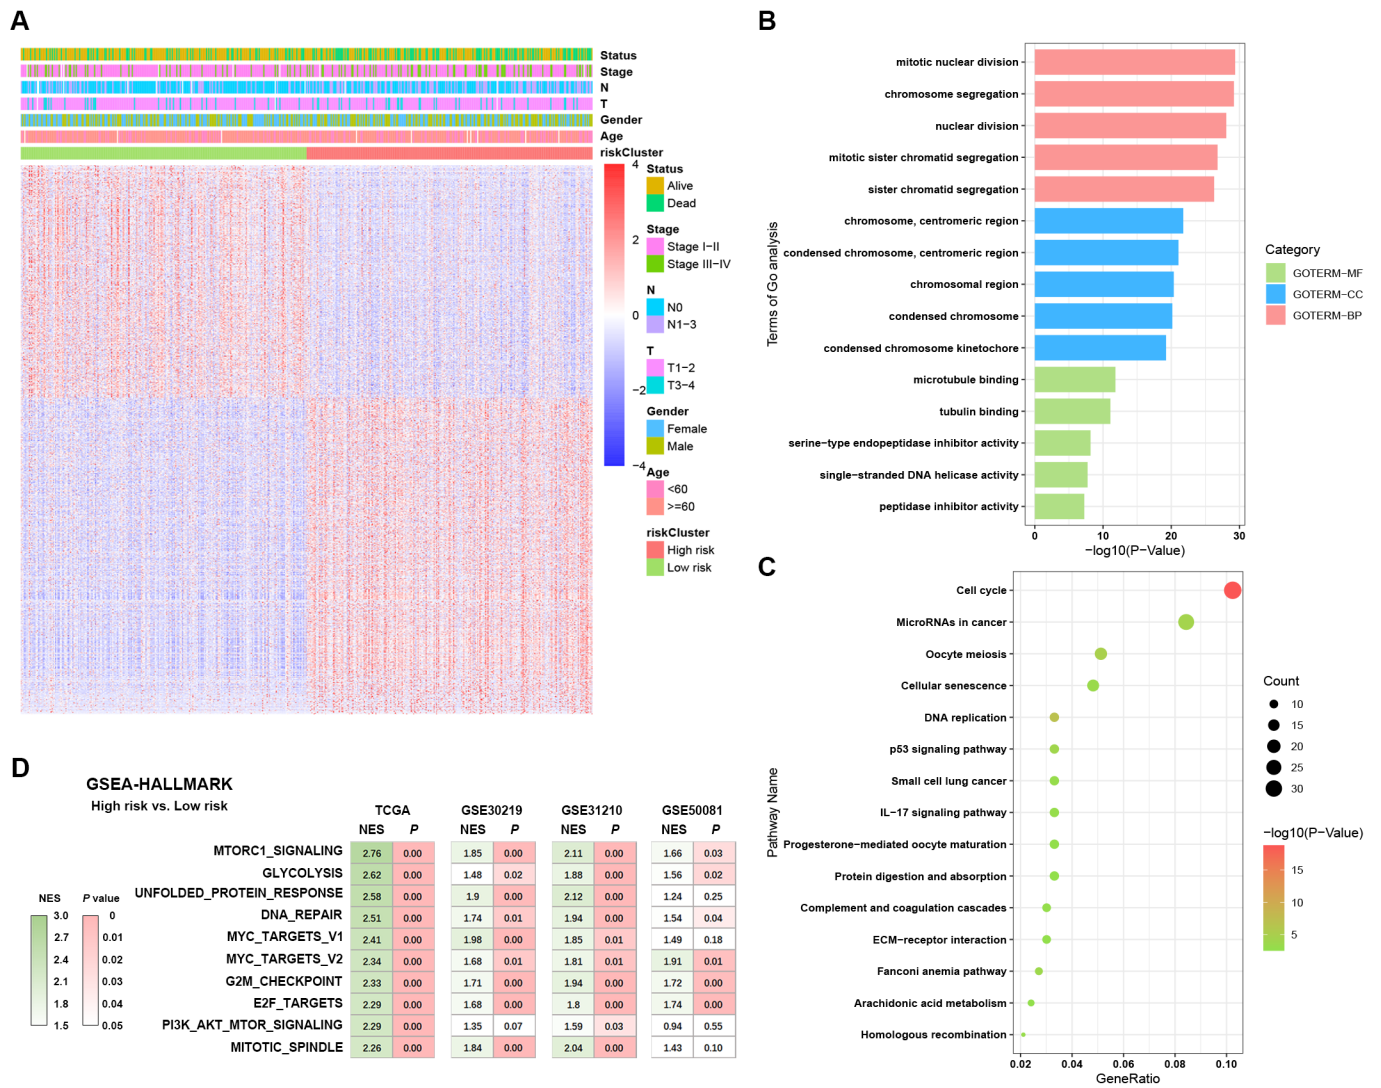

**Figure S6.**

A. Heatmap of significantly differentially expressed genes between the high- and low-risk groups.

B. GO enrichment analysis of the DEGs.

C. KEGG pathway enrichment analysis of the DEGs.

D. GSEA of hallmark gene sets compared between high-risk and low-risk groups.

# Figure S7

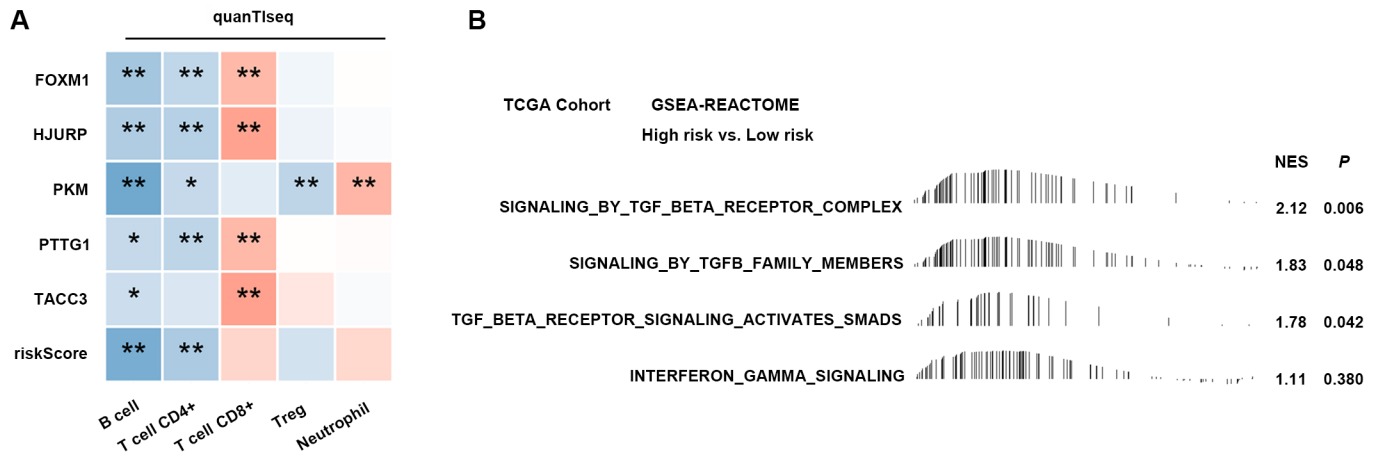

**Figure S7.**

A. Correlation analysis between risk scores and different immune cells estimated by quanTIseq.

B. GSEA of IFN $\gamma$ - and TGF $\beta$ -related gene signature comparisons between high- and low-risk groups.

\* and \*\* represent  $P < 0.05$  and  $P < 0.01$ , respectively.

**Figure S8**

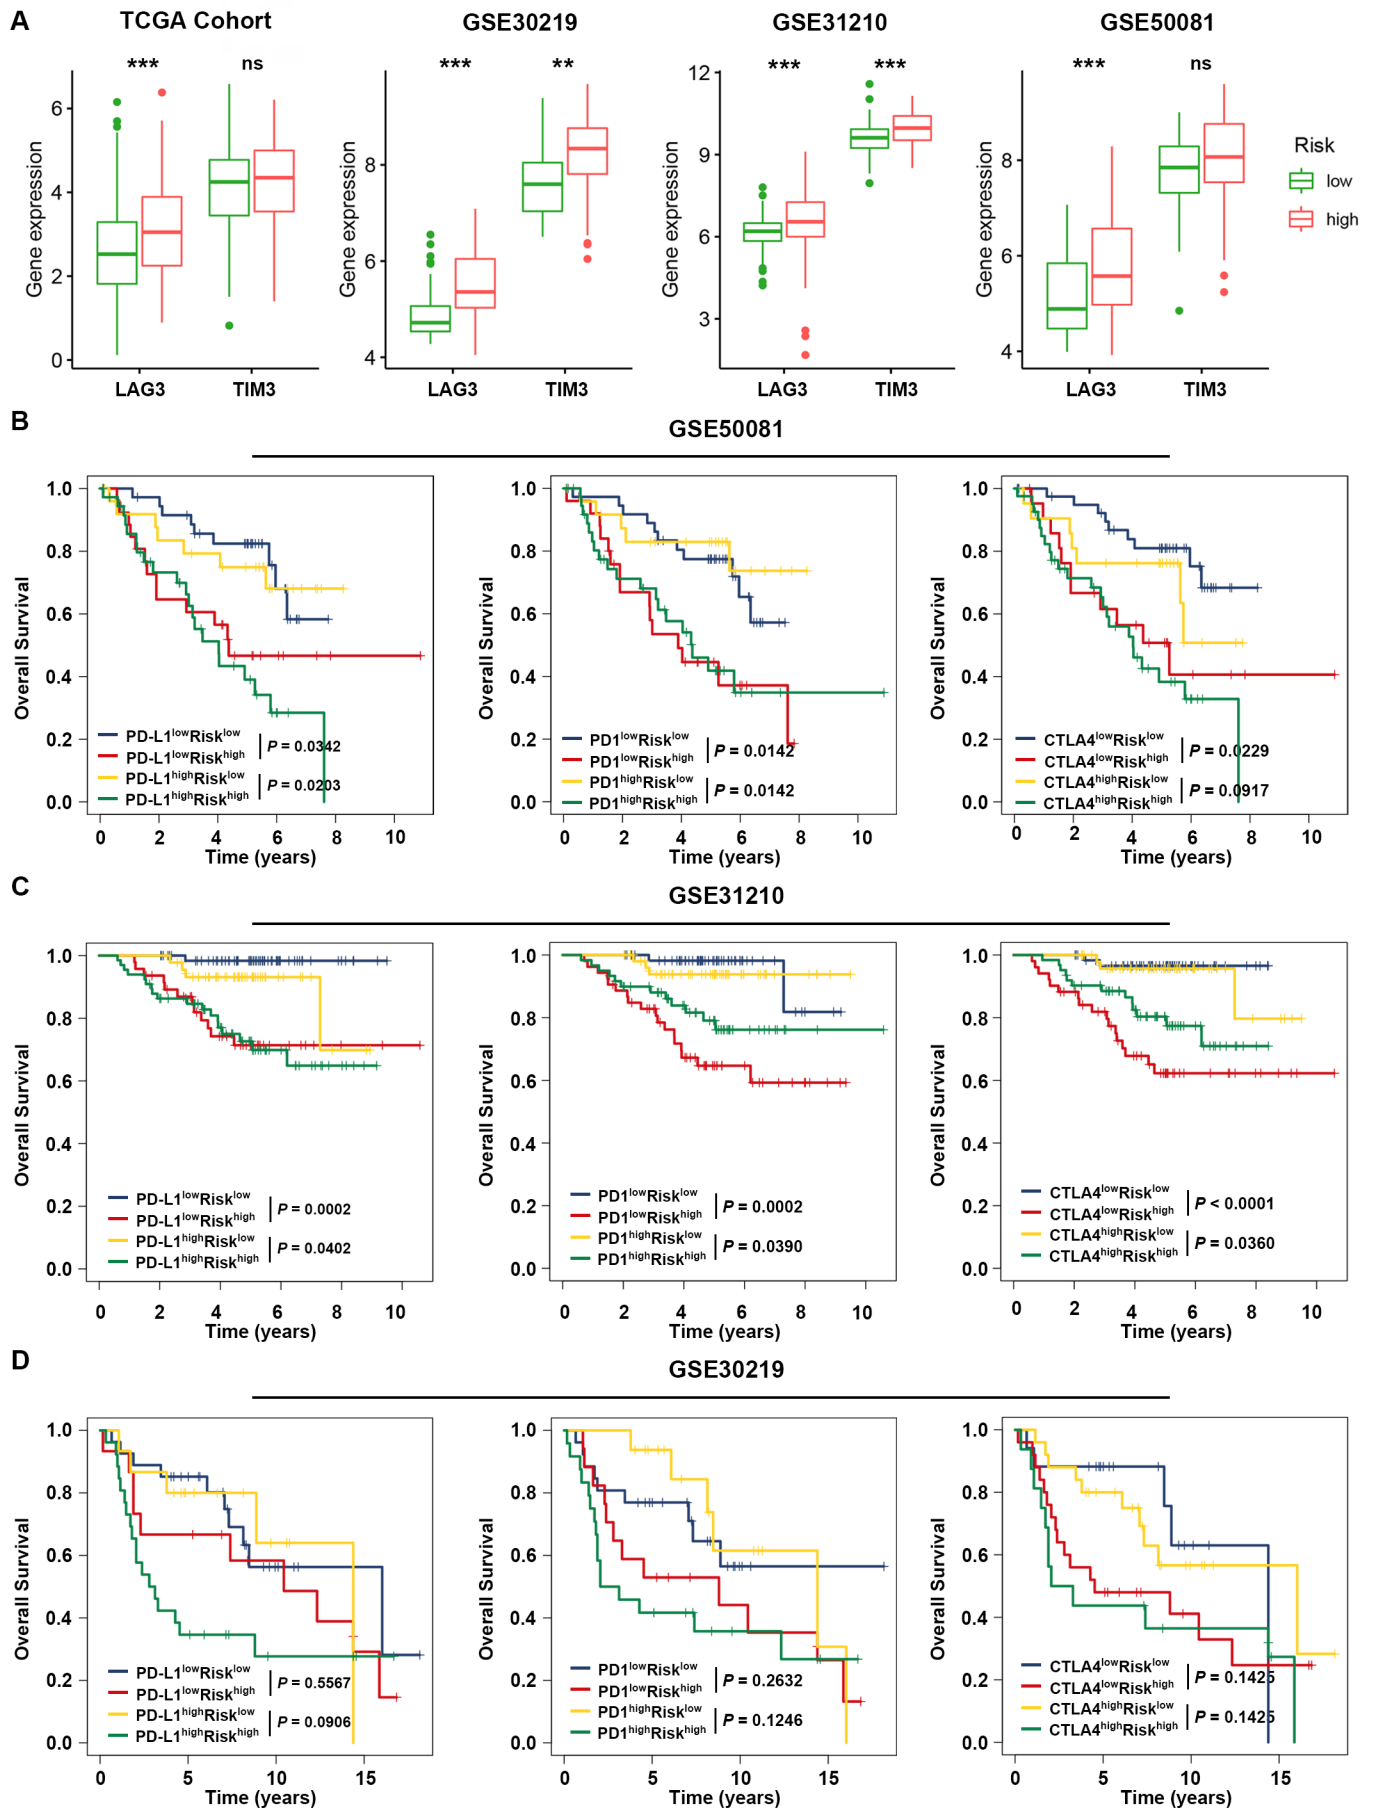

**Figure S8.**

A. Comparison of the expression level of T cell exhausted markers (LAG3 and TIM3) between high- and low-risk groups in the training cohort and validation cohorts.

B-D. Kaplan-Meier survival curves of OS among four patient groups divided by the SRS and immune checkpoints (PD-L1, PD-1 and CTLA4) in validation cohorts.

\*\* and \*\*\* represent  $P < 0.01$  and  $P < 0.001$ , respectively.



**Figure S9**

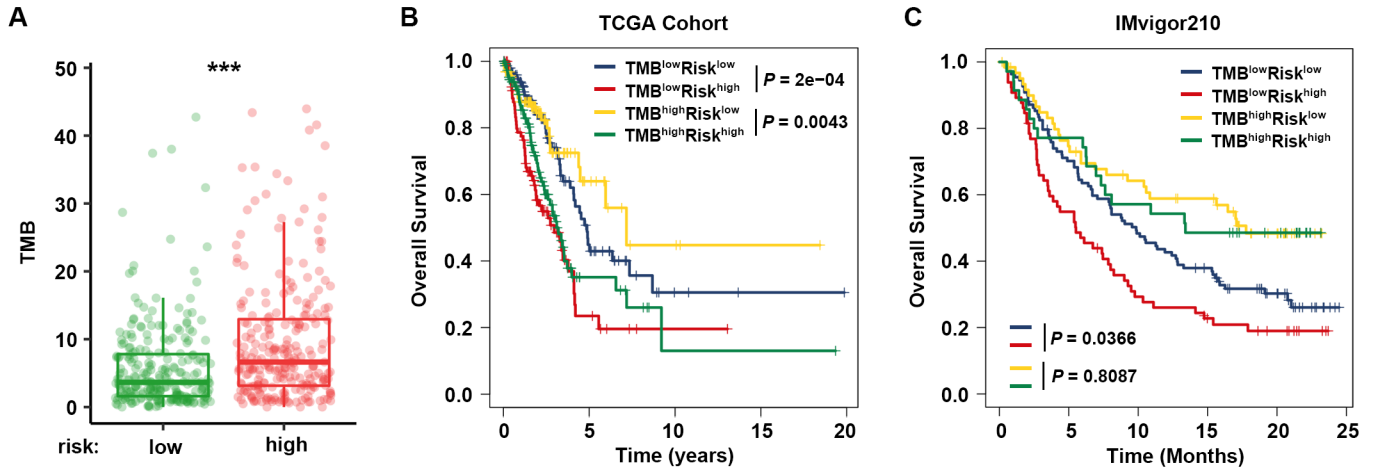

**Figure S9.**

A. Comparison of TMB in the high- and low-risk groups, \*\*\* represents  $P < 0.001$ .

B-C. Kaplan-Meier curves for four patient groups stratified by SRS and TMB in the TCGA cohort and IMvigor210 cohort.
